# Supplementary material for: Automated cot‐side tracking of functional brain age in preterm infants
Source: PubMed Central journal article supplement (PMC7318094; doi:10.1002/acn3.51043), 2020-05-05
Supplement: ACN3-7-891-s001.pdf [file ACN3-7-891-s001.pdf]

**Table S1:** Correlation between functional brain age (FBA) estimates, based on a single qEEG variable, and post-menstrual age (PMA) and variable selection frequency for multivariable models of FBA. All results were estimated within a leave-one-subject-out cross-validation. Type defines: B - a set representing measures of bursts, P - a set representing phenomenological interpretation of the EEG, O - a set representing other measures in the literature, <sup>1</sup> denotes bursts defined according to [1], <sup>2</sup> denote bursts defined according to [2], and selected denotes variable selection frequency.

| rank | qEEG variable                                                              | type | $r$   | selected |
|------|----------------------------------------------------------------------------|------|-------|----------|
| 1    | Asymmetry (all)                                                            | B    | 0.874 | 29       |
| 2    | Asymmetry (500ms-1s)                                                       | B    | 0.851 | 64       |
| 3    | Sharpness (500ms-1s)                                                       | B    | 0.845 | 51       |
| 4    | Burst Number <sup>1</sup> (4-8s)                                           | B    | 0.843 | 45       |
| 5    | Suppression Curve                                                          | O    | 0.842 | 63       |
| 6    | Burst Number <sup>1</sup> (2-4s)                                           | B    | 0.842 | 65       |
| 7    | Asymmetry (250-500ms)                                                      | B    | 0.829 | 35       |
| 8    | mean Phase Locking Index                                                   | O    | 0.822 | 62       |
| 9    | Path length (coherence)                                                    | O    | 0.811 | 65       |
| 10   | Burst Number <sup>1</sup> (1-2s)                                           | B    | 0.807 | 29       |
| 11   | Multi-Scale Entropy ( $\Delta$ 5 scales)                                   | O    | 0.807 | 64       |
| 12   | Multi-Scale Entropy (mean)                                                 | O    | 0.794 | 65       |
| 13   | Multi-Scale Entropy (maximum)                                              | O    | 0.778 | 60       |
| 14   | Mean Burst Duration <sup>1</sup>                                           | B    | 0.777 | 24       |
| 15   | Burst Number <sup>1</sup> (125-250ms)                                      | B    | 0.772 | 64       |
| 16   | Sharpness (1-2s)                                                           | B    | 0.720 | 57       |
| 17   | Burst Number <sup>1</sup> (500ms-1s)                                       | B    | 0.713 | 28       |
| 18   | Asymmetry (1s-2s)                                                          | B    | 0.676 | 28       |
| 19   | Slope of linear fit to burst area vs burst duration <sup>1</sup>           | B    | 0.667 | 63       |
| 20   | Number of bursts <sup>1</sup>                                              | B    | 0.656 | 65       |
| 21   | Alpha (truncated power law fit to CDF of burst size)                       | B    | 0.644 | 53       |
| 22   | Intercept of linear fit to asymmetry vs burst duration <sup>1</sup>        | B    | 0.643 | 35       |
| 23   | Sharpness (62.5-125ms)                                                     | B    | 0.630 | 65       |
| 24   | Activity Synchrony Index (global)                                          | O    | 0.627 | 1        |
| 25   | Sharpness (1-2s)                                                           | B    | 0.618 | 49       |
| 26   | Range EEG (5th percentile, quiet sleep)                                    | P    | 0.595 | 2        |
| 27   | Range EEG (5th percentile, full recording)                                 | P    | 0.592 | 47       |
| 28   | Cross-Channel Correlation (full recording)                                 | P    | 0.572 | 58       |
| 29   | Inter-Burst Interval <sup>2</sup> (95th percentile, full recording)        | P    | 0.572 | 13       |
| 30   | Inter-Burst Interval <sup>2</sup> (median, quiet sleep)                    | P    | 0.567 | 1        |
| 31   | Cross-Channel Correlation (quiet sleep)                                    | P    | 0.566 | 24       |
| 32   | Alpha (truncated power law fit to CDF of burst duration)                   | B    | 0.565 | 12       |
| 33   | Sharpness (s)                                                              | B    | 0.563 | 7        |
| 34   | Inter-Burst Interval <sup>2</sup> (median, full recording)                 | P    | 0.553 | 65       |
| 35   | Bursts per hour <sup>2</sup> (full recording)                              | P    | 0.535 | 28       |
| 36   | RMS Inter-Burst Interval <sup>2</sup> (full recording)                     | P    | 0.530 | 5        |
| 37   | Bursts per hour <sup>2</sup> (quiet sleep)                                 | P    | 0.527 | 6        |
| 38   | Inter-Burst Interval <sup>2</sup> (95th percentile, quiet sleep)           | P    | 0.525 | 3        |
| 39   | Range EEG (95th percentile, full recording)                                | P    | 0.524 | 54       |
| 40   | RMS Inter-Burst Interval <sup>2</sup> (quiet sleep)                        | P    | 0.522 | 1        |
| 41   | Lambda (truncated power law fit to CDF of burst size)                      | B    | 0.521 | 19       |
| 42   | Sharpness (125-250ms)                                                      | B    | 0.505 | 45       |
| 43   | Intercept of linear fit to burst size vs burst duration <sup>1</sup>       | B    | 0.502 | 65       |
| 44   | EEG envelope (95th percentile, full recording)                             | P    | 0.495 | 57       |
| 45   | Relative Alpha Power (quiet sleep)                                         | P    | 0.481 | 65       |
| 46   | Burst Number <sup>1</sup> (62.5-125ms)                                     | B    | 0.480 | 37       |
| 47   | EEG envelope (5th percentile, quiet sleep)                                 | P    | 0.478 | 1        |
| 48   | Activity Synchrony Index (hemispheric)                                     | O    | 0.474 | 28       |
| 49   | Log-Likelihood Ratio of Fit (truncated power law fit to CDF of burst size) | B    | 0.473 | 8        |
| 50   | Sharpness (all)                                                            | B    | 0.467 | 59       |
| 51   | Range EEG (95th percentile, quiet sleep)                                   | P    | 0.460 | 42       |
| 52   | Relative alpha power (full recording)                                      | P    | 0.440 | 63       |

|    |                                                                                |   |        |    |
|----|--------------------------------------------------------------------------------|---|--------|----|
| 53 | Inter-Burst Interval <sup>2</sup> (5th percentile, full recording)             | P | 0.440  | 29 |
| 54 | Inter-Burst Interval <sup>2</sup> (5th percentile, quiet sleep)                | P | 0.433  | 10 |
| 55 | Total spectral power (full recording)                                          | P | 0.433  | 26 |
| 56 | EEG envelope (5th percentile, full recording)                                  | P | 0.425  | 33 |
| 57 | Temporal Theta Power (full recording)                                          | P | 0.425  | 44 |
| 58 | EEG Envelope (95th percentile, quiet sleep)                                    | P | 0.416  | 16 |
| 59 | Asymmetry (2-4s)                                                               | B | 0.353  | 24 |
| 60 | Log-Likelihood Ratio of Fit (truncated power law fit to CDF of burst duration) | B | 0.341  | 60 |
| 61 | Total spectral power (quiet sleep)                                             | P | 0.338  | 35 |
| 62 | Burst duration <sup>2</sup> (median, quiet sleep)                              | P | 0.337  | 17 |
| 63 | Temporal Theta Power (quiet sleep)                                             | P | 0.328  | 47 |
| 64 | Asymmetry (125-250ms)                                                          | B | 0.32   | 29 |
| 65 | Burst duration (5th percentile, quiet sleep)                                   | P | 0.324  | 33 |
| 66 | $s_{min}$ (truncated power law fit to CDF of burst duration)                   | B | 0.323  | 15 |
| 67 | Burst duration <sup>2</sup> (5th percentile, full recording)                   | P | 0.304  | 16 |
| 68 | Activity Synchrony Index (quiet sleep)                                         | P | 0.283  | 0  |
| 69 | Segment Rate                                                                   | O | 0.246  | 36 |
| 70 | Activity Synchrony Index (full recording)                                      | P | 0.245  | 65 |
| 71 | Coefficient of variation (burst durations) <sup>1</sup>                        | B | 0.231  | 61 |
| 72 | Slope of linear fit to sharpness vs burst duration <sup>1</sup>                | B | 0.227  | 19 |
| 73 | Burst duration <sup>2</sup> (median, full recording)                           | P | 0.227  | 3  |
| 74 | Relative delta 1 power (quiet sleep)                                           | P | 0.221  | 58 |
| 75 | Relative delta 2 power (quiet sleep)                                           | P | 0.210  | 23 |
| 76 | Range EEG (median, quiet sleep)                                                | P | 0.206  | 14 |
| 77 | Lambda (truncated power law fit to CDF of burst duration)                      | B | 0.202  | 45 |
| 78 | Burst duration <sup>2</sup> (95th percentile, full recording)                  | P | 0.193  | 10 |
| 79 | EEG Envelope (median, quiet sleep)                                             | P | 0.187  | 2  |
| 80 | RMS burst duration <sup>2</sup> (full recording)                               | P | 0.169  | 2  |
| 81 | Relative delta 2 power (full recording)                                        | P | 0.166  | 65 |
| 82 | Relative delta 1 power (full recording)                                        | P | 0.151  | 60 |
| 83 | Asymmetry (4-8s)                                                               | B | 0.130  | 14 |
| 84 | Slope of linear fit to asymmetry vs burst duration <sup>1</sup>                | B | 0.120  | 6  |
| 85 | Relative theta power (full recording)                                          | P | 0.084  | 56 |
| 86 | Asymmetry (62.5-125ms)                                                         | B | 0.068  | 42 |
| 87 | Range EEG (median, full recording)                                             | P | 0.062  | 49 |
| 88 | Sharpness (4-8s)                                                               | B | 0.058  | 0  |
| 89 | EEG Envelope (median, full recording)                                          | P | 0.043  | 65 |
| 90 | $s_{min}$ (truncated power law fit to CDF of burst area)                       | B | -0.013 | 47 |
| 91 | Relative theta power (quiet sleep)                                             | P | -0.024 | 62 |
| 92 | Range EEG (bandwidth)                                                          | O | -0.088 | 30 |
| 93 | Burst duration <sup>2</sup> (95th percentile, quiet sleep)                     | P | -0.106 | 0  |
| 94 | RMS burst duration <sup>2</sup> (quiet sleep)                                  | P | -0.167 | 0  |
| 95 | Burst number <sup>1</sup> (250-500ms)                                          | B | -0.221 | 40 |
| 96 | Intercept of linear fit to sharpness vs burst duration <sup>1</sup>            | B | -0.310 | 4  |

## References

- [1] Roberts JA, Iyer KK, Finnigan S et al. Scale-free bursting in human cortex following hypoxia at birth. *J Neurosci* 2014; 34: 6557-6572.
- [2] Palmu K, Stevenson N, Wikström S et al. Optimization of an NLEO-based algorithm for automated detection of spontaneous activity transients in early preterm EEG. *Physiol Meas* 2010; 31: N85-93.
